# Supplementary material
Source: PubMed Central journal article supplement (PMC7735708)
Supplement: ja0c09041_si_001.pdf [file ja0c09041_si_001.pdf]

# Supporting Information

to

## Unifying conceptual density functional and valence bond theory:

## The hardness-softness conundrum associated with protonation reactions and uncovering complementary reactivity modes

Thijs Stuyver,<sup>\*a</sup> and Sason Shaik<sup>\*a</sup>

<sup>a</sup> Institute of Chemistry, Edmond J. Safara Campus at Givat Ram, The Hebrew University, Jerusalem  
9190401, Israel

|                                                                                                                                          |           |
|------------------------------------------------------------------------------------------------------------------------------------------|-----------|
| <b>S1. Comparison of the BOVB results with the DFVB results for a selected subset of considered systems ...</b>                          | <b>2</b>  |
| <b>S2. Comparison of the DFVB results with the DFT results and experimental data.....</b>                                                | <b>3</b>  |
| <b>S3. Bond scanning profiles for the protonation reactions .....</b>                                                                    | <b>5</b>  |
| <b>S4. Connection between the presented VB framework and the empirical factors previously identified as driving pKa values .....</b>     | <b>7</b>  |
| <b>S5. Comparison between the VB-analogue of the Fukui function and the conventional Fukui function.....</b>                             | <b>9</b>  |
| <b>S6. Spin densities of the ground-state and first excited state for [HSHNSH]<sup>+•</sup> in its optimal and twisted geometry.....</b> | <b>15</b> |
| <b>S7. Tuning the state ordering through captodative substitution.....</b>                                                               | <b>16</b> |
| <b>S8. Utility to scan for a minimum electrostatic potential value.....</b>                                                              | <b>17</b> |
| <b>S9. Geometries and Energies.....</b>                                                                                                  | <b>20</b> |

## S1. Comparison of the BOVB results with the DFVB results for a selected subset of considered systems

From Table S1 it is clear that the bonding situations are equally well described by BOVB and DFVB level-of-theory; the only quantity that differs significantly between both methods is the bonding energy. The latter finding is in line with expectations, since DFVB generally does a better job at recovering the full bonding energy than BOVB (see also Section S2; cf. Ref. 46 in the main text).

**Table S1.** The weights of the HL and the main ionic structures ( $w_{\text{HL}}$  and  $w_{\text{ion},1}$ ), the resonance energy (RE) and the spacing between the HL and main ionic state ( $\Delta E_{\text{HL-ion},1}$ ) at the optimal bonding distance and the adiabatic bonding energy obtained for  $[\text{H}_3\text{N-H}]^+$ ,  $[\text{H}_2\text{S-H}]^+$  and  $[\text{H}_2\text{O-H}]^+$  at respectively BOVB-d/6-311++G\*\*/(U)B3LYP/def2-TZVP and DFVB(LYP)/6-311++G\*\*/(U)B3LYP/def2-TZVP level-of-theory.

|                                   | $w_{\text{HL}}$ | $w_{\text{ion},1}$ | RE <sup>a</sup> | $\Delta E_{\text{HL-ion},1}$ <sup>a</sup> | Bonding energy <sup>a</sup> |
|-----------------------------------|-----------------|--------------------|-----------------|-------------------------------------------|-----------------------------|
| $[\text{H}_3\text{N-H}]^+$ - BOVB | 0.61            | 0.33               | 39.0            | 58.7                                      | 130.6                       |
| $[\text{H}_3\text{N-H}]^+$ - DFVB | 0.62            | 0.36               | 34.8            | 56.3                                      | 138.6                       |
| $[\text{H}_2\text{S-H}]^+$ - BOVB | 0.68            | 0.26               | 21.1            | 101.8                                     | 85.9                        |
| $[\text{H}_2\text{S-H}]^+$ - DFVB | 0.68            | 0.26               | 21.7            | 98.7                                      | 95.4                        |
| $[\text{H}_2\text{O-H}]^+$ - BOVB | 0.55            | 0.41               | 70.7            | 11.8                                      | 132.8                       |
| $[\text{H}_2\text{O-H}]^+$ - DFVB | 0.56            | 0.44               | 63.8            | 9.3                                       | 146.8                       |

<sup>a</sup> in kcal/mol

## S2. Comparison of the DFVB results with the DFT results and experimental data

**Table S2.** The bonding energy and  $A_{H^+} - I_R$  (in kcal/mol) computed at respectively DFVB(LYP)/6-311++G\*\*/(U)B3LYP/def2-TZVP, (U)B3LYP/def2-TZVP(+ZPE) [DFT(a)], (U)B3LYP/6-311++G\*\*/(U)B3LYP/def2-TZVP(+ZPE) [DFT(b)] level-of-theory and (experimental) literature values for  $A_{H^+} - I_R$  for each of the systems considered in the main text. Note the significant overestimation of the  $A_{H^+} - I_R$  value calculated with the DFVB method.

|                       | Bonding energy     |                      | Bonding energy |                        | Bonding energy |                        | $A_{H^+} - I_R$    |
|-----------------------|--------------------|----------------------|----------------|------------------------|----------------|------------------------|--------------------|
|                       | DFVB               | $A_{H^+} - I_R$ DFVB | DFT(a)         | $A_{H^+} - I_R$ DFT(a) | DFT(b)         | $A_{H^+} - I_R$ DFT(b) | literature         |
| $[H_2S-H]^+$          | 95.4               | 83.9                 | 95.1           | 73.6                   | 93.7           | 73.1                   | 72.5 <sup>1</sup>  |
| $[H_2O-H]^+$          | 146.8              | 39.3                 | 143.2          | 21.0                   | 143.9          | 19.7                   | 22.6 <sup>1</sup>  |
| $[H_3N-H]^+$          | 138.6              | 80.0                 | 140.0          | 62.7                   | 140.6          | 62.7                   | 66.8 <sup>2</sup>  |
| $[H_2NOH_2]^+$        | 97.6 <sup>a</sup>  | 106.0 <sup>a</sup>   | 98.3           | 70.1                   | 98.5           | 68.7                   | /                  |
| $[H_3NOH]^+$          | 123.9 <sup>a</sup> | 106.0 <sup>a</sup>   | 123.6          | 70.1                   | 123.6          | 68.7                   | /                  |
| $[H_2NSH_2]^+$        | 98.5               | 106.0                | 93.3           | 90.8                   | 100.7          | 77.9                   | /                  |
| $[H_3NSH]^+$          | 117.3              | 106.0                | 105.8          | 90.8                   | 119.8          | 77.9                   | /                  |
| $[C_6H_5N-H]^+$       | 135.8 <sup>b</sup> | 120.6 <sup>b</sup>   | 125.5          | 97.1                   | 125.5          | 96.8                   | 100.2 <sup>1</sup> |
| $[C_6H_6N]^+_{ortho}$ | 71.2 <sup>b</sup>  | 120.6 <sup>b</sup>   | 69.5           | 97.1                   | 70.4           | 96.8                   | 100.2 <sup>1</sup> |

|                                                  |                   |                    |      |      |      |      |                    |
|--------------------------------------------------|-------------------|--------------------|------|------|------|------|--------------------|
| $[\text{C}_6\text{H}_6\text{N}]^+_{\text{meta}}$ | 82.5 <sup>b</sup> | 120.6 <sup>b</sup> | 76.2 | 97.1 | 77.0 | 96.8 | 100.2 <sup>1</sup> |
| $[\text{C}_6\text{H}_6\text{N}]^+_{\text{para}}$ | 61.2 <sup>b</sup> | 120.6 <sup>b</sup> | 64.1 | 97.1 | 70.4 | 96.8 | 100.2 <sup>1</sup> |

---

<sup>a</sup> The geometry of dissociated H<sub>3</sub>NOH was selected to evaluate the energetics in the asymptotic limit

<sup>b</sup> The geometry of dissociated N-protonated pyridine was selected to evaluate the energetics in the asymptotic limit

### S3. Bond scanning profiles for the protonation reactions

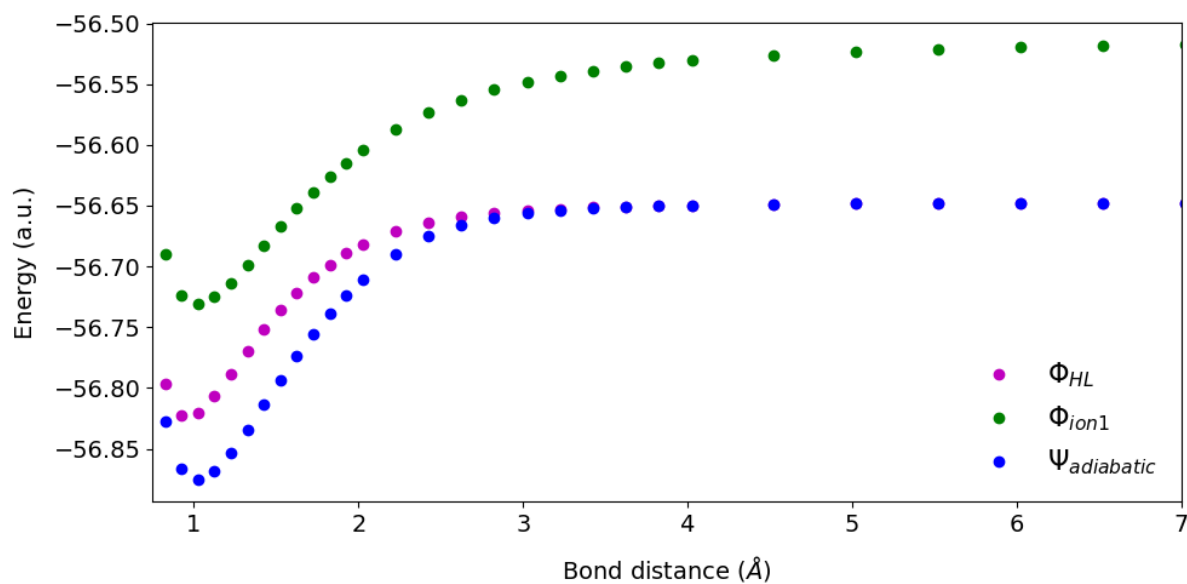

**Figure S1.** Evolution of the energy of  $\Phi_{HL}$ ,  $\Phi_{ion1}$  and  $\Psi_{adiabatic}$  as a function of the N-H bond distance in  $\text{NH}_4^+$ , calculated at DFVB(LYP)/6-311++G\*\*// $(U)$ B3LYP/def2-TZVP level-of-theory.

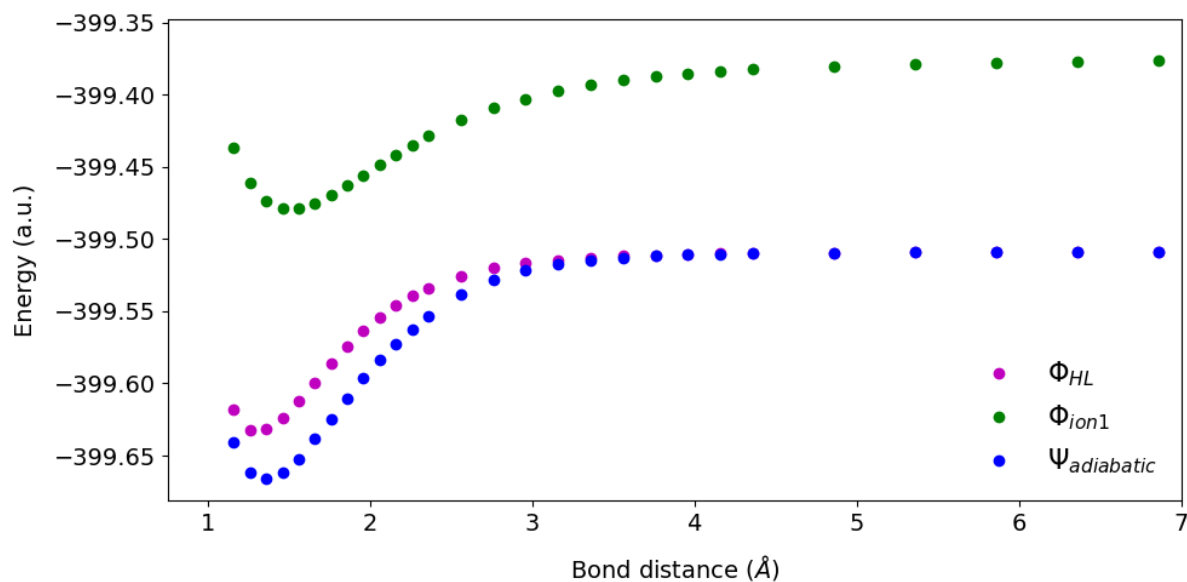

**Figure S2.** Evolution of the energy of  $\Phi_{HL}$ ,  $\Phi_{ion1}$  and  $\Psi_{adiabatic}$  as a function of the S-H bond distance in  $\text{H}_3\text{S}^+$ , calculated at DFVB(LYP)/6-311++G\*\*// $(U)$ B3LYP/def2-TZVP level-of-theory.

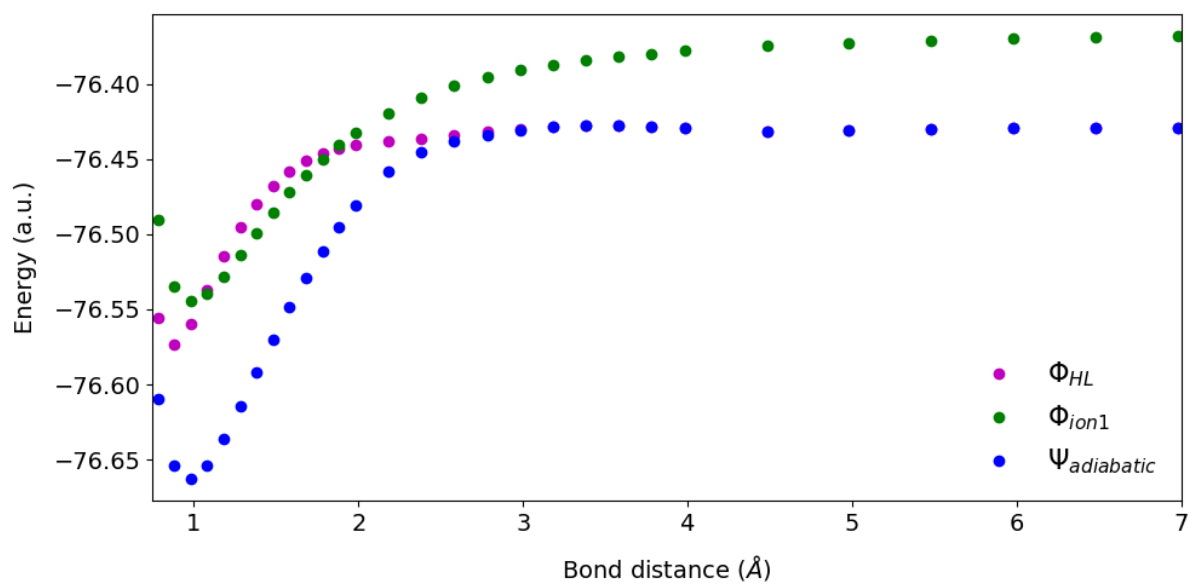

**Figure S3.** Evolution of the energy of  $\Phi_{HL}$ ,  $\Phi_{ion1}$  and  $\Psi_{adiabatic}$  as a function of the O-H bond distance in  $H_3O^+$ , calculated at DFVB(LYP)/6-311++G\*\*/(U)B3LYP/def2-TZVP level-of-theory.

#### **S4. Connection between the presented VB framework and the empirical factors previously identified as driving pK<sub>a</sub> values**

In a set of recent papers, cf. Ref. 57 – 59 in the main text, Liu and co-workers connected a variety of electronic and reactivity descriptors emerging from a CDFT framework to the experimental acid strengths of a variety of structurally related sets of acidic compounds and complexes. Interestingly, the main factors probed/identified in these studies also emerge (in a modified version) in our own VB-based framework to describe protonation propensities:

- (a) The authors observed a (negatively sloped) linear correlation between the MEP value on the association site and the experimental pK<sub>a</sub> values. As indicated in the main text, MEP values are good descriptors of the electrostatic part of the interaction energy. Hence, when a set of compounds with common structural features in close proximity of the protonation site (but varying substituents in more distant positions of the molecule or complex) are considered – resulting in a more or less constant spin-pairing/ (frontier) orbital contribution across the series but a variable electrostatic (long-range) contribution – then this descriptor can be expected to correlate well with the experimental pK<sub>a</sub> values.
- (b) The authors observed a (positively sloped) linear correlation between the chemical potential of the reaction partner R ( $\mu_R = \frac{1}{2}[I_R + A_R]$ ) and the experimental pK<sub>a</sub> values. This finding can also be connected to our model through realization that  $\mu_R$  acts as a probe for the spacing between the HL and ionic structure in our model, i.e.  $I_H - I_R$  (cf. Eq. 2 in the main text): since  $A_R$  is a rather small quantity in most (saturated) organic compounds (relative to  $I_R$ ) and  $I_H$  is by definition a constant for all protonation processes, the magnitude of  $\mu_R$  effectively acts as an indicator of the magnitude of  $I_R$ . Hence, this quantity tells us something about the magnitude of the

spin-pairing interaction when a single elemental type is considered for the association site within a set of structurally related acids. This realization is further corroborated by the finding in other studies that the  $pK_a$  correlates with  $E_{\text{HOMO,R}}$  (another quantity connected to  $I_R$ ), cf. Ref. 65.



## S5. Comparison between the VB-analogue of the Fukui function and the conventional Fukui function

Throughout the main text, we focus on the VB-inspired analogue of the Fukui function, i.e. the spin density of the (positively) charged compound, as a descriptor of the spin-pairing/orbital interaction. In the literature, this descriptor is often referred to as a so-called “Parr function”. As indicated in Ref. 61 and 62 in the main text, this descriptor corresponds – within reasonable bounds – to the traditional (CDFT) definition of the Fukui function (in its finite difference approximation), i.e.  $f^-(\mathbf{r}) = \rho_N(\mathbf{r}) - \rho_{N-1}(\mathbf{r})$ . Below, this finding was verified for each of the systems considered in the present study. Note that while there are numerical shifts between the two spin-pairing/orbital interaction descriptors, the emerging trends are identical.

**Table S3.** Comparison between the atom-condensed conventional Fukui function and its VB-inspired analogue for NH<sub>3</sub>, derived from the ground-state wavefunctions calculated at (U)B3LYP/def2-TZVP level-of-theory.

|   | Conventional Fukui<br>function (in au) | VB-inspired analogue of the<br>Fukui function (in au) |
|---|----------------------------------------|-------------------------------------------------------|
| N | 0.81261                                | 1.04088                                               |
| H | 0.06246                                | -0.01363                                              |
| H | 0.06246                                | -0.01363                                              |
| H | 0.06246                                | -0.01363                                              |

**Table S4.** Comparison between the atom-condensed conventional Fukui function and its VB-inspired analogue for H<sub>2</sub>S, derived from the ground-state wavefunctions calculated at (U)B3LYP/def2-TZVP level-of-theory.

|   | Conventional Fukui<br>function (in au) | VB-inspired analogue of the<br>Fukui function (in au) |
|---|----------------------------------------|-------------------------------------------------------|
| S | 0.92495                                | 1.04124                                               |
| H | 0.03752                                | -0.02062                                              |
| H | 0.03752                                | -0.02062                                              |

**Table S5.** Comparison between the atom-condensed conventional Fukui function and its VB-inspired analogue for H<sub>2</sub>O, derived from the ground-state wavefunctions calculated at (U)B3LYP/def2-TZVP level-of-theory.

|   | Conventional Fukui<br>function (in au) | VB-inspired analogue of the<br>Fukui function (in au) |
|---|----------------------------------------|-------------------------------------------------------|
| O | 0.86881                                | 1.04218                                               |
| H | 0.06559                                | -0.0211                                               |
| H | 0.06559                                | -0.02109                                              |

**Table S6.** Comparison between the atom-condensed conventional Fukui function and its VB-inspired analogue for H<sub>2</sub>NOH, derived from the ground-state wavefunctions calculated at (U)B3LYP/def2-TZVP level-of-theory.

|   | Conventional Fukui<br>function (in au) | VB-inspired analogue of the<br>Fukui function (in au) |
|---|----------------------------------------|-------------------------------------------------------|
| N | 0.54246                                | 0.80068                                               |
| H | 0.08287                                | -0.00691                                              |
| H | 0.08287                                | -0.00691                                              |
| O | 0.21194                                | 0.1971                                                |
| H | 0.07987                                | 0.01605                                               |

**Table S7.** Comparison between the atom-condensed conventional Fukui function and its VB-inspired analogue for H<sub>2</sub>NSH, derived from the ground-state wavefunctions calculated at (U)B3LYP/def2-TZVP level-of-theory.

|   | Conventional Fukui<br>function (in au) | VB-inspired analogue of the<br>Fukui function (in au) |
|---|----------------------------------------|-------------------------------------------------------|
| N | 0.00073                                | -0.01005                                              |
| H | 0.06973                                | 0.02049                                               |
| H | 0.06976                                | 0.02051                                               |
| S | 0.82356                                | 0.98757                                               |
| H | 0.03622                                | -0.01852                                              |

**Table S8.** Comparison between the atom-condensed conventional Fukui function and its VB-inspired analogue for HONHOH, derived from the ground-state wavefunctions calculated at (U)B3LYP/def2-TZVP level-of-theory.

|   | Conventional Fukui<br>function (in au) | VB-inspired analogue of the<br>Fukui function (in au) |
|---|----------------------------------------|-------------------------------------------------------|
| N | 0.37779                                | 0.59123                                               |
| H | 0.08587                                | -0.00746                                              |
| O | 0.2049                                 | 0.20265                                               |
| H | 0.06327                                | 0.00547                                               |
| O | 0.20491                                | 0.20266                                               |
| H | 0.06327                                | 0.00546                                               |

**Table S9.** Comparison between the atom-condensed conventional Fukui function and its VB-inspired analogue for HSNHSH, derived from the ground-state wavefunctions calculated at (U)B3LYP/def2-TZVP level-of-theory.

|   | Conventional Fukui<br>function (in au) | VB-inspired analogue of the<br>Fukui function (in au) |
|---|----------------------------------------|-------------------------------------------------------|
| N | -0.03732                               | -0.01738                                              |
| H | 0.03542                                | -0.0018                                               |

|   |         |          |
|---|---------|----------|
| S | 0.46203 | 0.51894  |
| H | 0.03894 | -0.00933 |
| S | 0.462   | 0.51891  |
| H | 0.03893 | -0.00933 |

---

**Table S10.** Comparison between the atom-condensed conventional Fukui function and its VB-inspired analogue for pyridine, derived from the ground-state wavefunctions calculated at (U)B3LYP/def2-TZVP level-of-theory.

|                    | Conventional Fukui<br>function (in au) | VB-inspired analogue of the<br>Fukui function (in au) |
|--------------------|----------------------------------------|-------------------------------------------------------|
| C <sub>ortho</sub> | -0.02148                               | -0.01812                                              |
| C <sub>meta</sub>  | 0.06172                                | 0.078                                                 |
| C <sub>para</sub>  | 0.08453                                | -0.02916                                              |
| C <sub>meta</sub>  | 0.06172                                | 0.078                                                 |
| C <sub>ortho</sub> | -0.02148                               | -0.01812                                              |
| N                  | 0.4744                                 | 0.82536                                               |
| H                  | 0.05843                                | 0.01419                                               |
| H                  | 0.08826                                | 0.02756                                               |

|   |         |         |
|---|---------|---------|
| H | 0.06283 | 0.00737 |
|---|---------|---------|

|   |         |         |
|---|---------|---------|
| H | 0.06283 | 0.00737 |
|---|---------|---------|

|   |         |         |
|---|---------|---------|
| H | 0.08825 | 0.02756 |
|---|---------|---------|

---

## S6. Spin densities of the ground-state and first excited state for [HSHNSH]<sup>+</sup>• in its optimal and twisted geometry

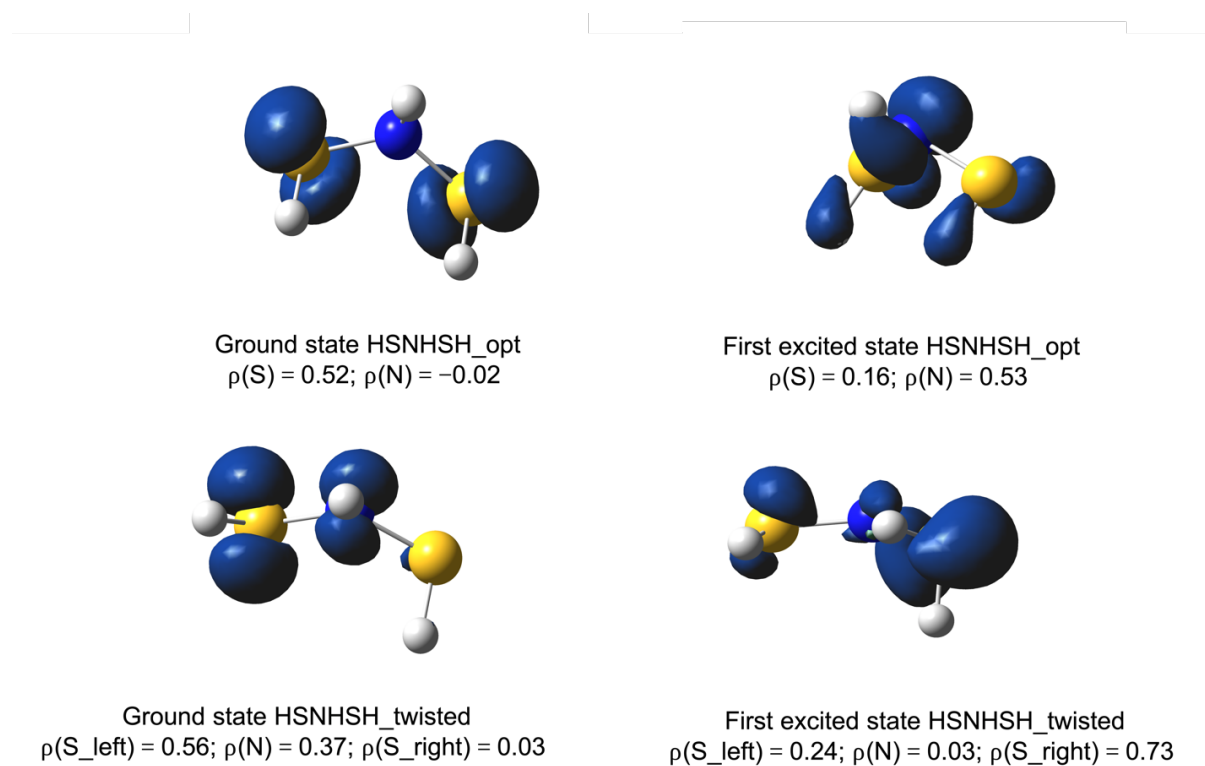

**Figure S4.** The spin density associated with the ground-state and first excited state of [HSHNSH]<sup>+</sup>• in its optimal geometry ( $\Delta E_{\text{excitation}} = 11.7$  kcal/mol) and the geometry in which the dihedral angle H-S-N-H has been twisted to maximize the overlap between the lone pairs ( $\Delta E_{\text{excitation}} = 22.5$  kcal/mol).

## S7. Tuning the state ordering through captodative substitution

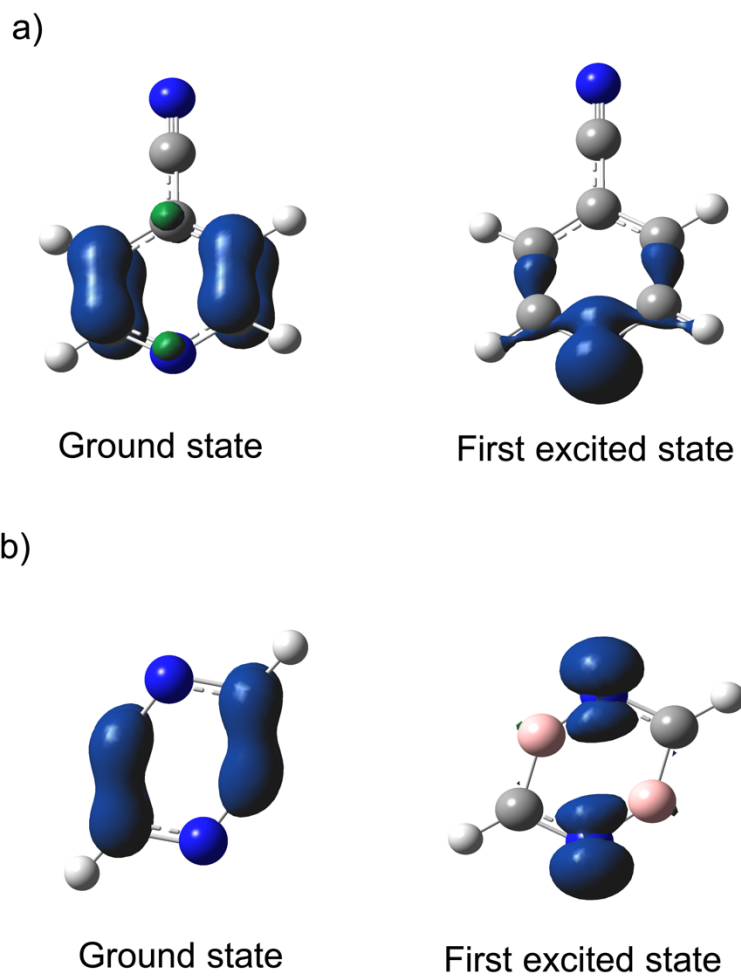

**Figure S5.** a) Spin density contour maps for the ground- and first excited state of [4-cyano pyridine]<sup>•+</sup>; b) spin density maps for the ground- and first excited state of [C<sub>2</sub>B<sub>2</sub>N<sub>2</sub>H<sub>4</sub>]<sup>•+</sup>.



## S8. Utility to scan for a minimum electrostatic potential value

As indicated in the main text, a small utility was written to scan for the minimum value of the electrostatic potential along a specific axis away from the atom center for pyridine. The utility takes a regular Gaussian .cube file as input. Because the pyridine molecule in our calculation was aligned with the xy-plane, the electrostatic potential for the C-sites could simply be scanned in the z-direction; the electrostatic potential for the in-plane lone pair associated with the N-site was scanned in the y-direction.

For the ortho-site, the minimum of the electrostatic potential (reached at a distance of 2.3 Å from the atomic center) amounted to -6.7 kcal/mol. For the meta-site, this quantity amounted to -5.1 kcal/mol and for the para-site to -3.9 kcal/mol (reached at 2.2 Å and 2.1 Å respectively). For the N-site, the minimum, amounting to -59.0 kcal/mol, was reached at a distance of 1.4 Å away from the atom center.

The full code is displayed below.

```
import math

def read_cube_file(filename, N1, N2, N3):
    """ reads in the .cube file into a 3D-matrix object by iterating
    through the N1, N2 and N3 dimensions """
    matrix = []

    with open(filename, 'r') as f_obj:
        contents = f_obj.read()
        line_list = contents.split("\n")
        f_obj.close()

    for i in range(N1):
        matrix.append([])
        for j in range(N2):
            matrix[i].append([])

    full_value_list = []

    for line in line_list:
        temp_list = list(map(float, tuple(line.split())))

        for number in temp_list:
            full_value_list.append(number)
```

```

for i in range(N1):
    for j in range(N2):
        for k in range(N3):
            matrix[i][j].append(full_value_list[i * N2 * N3 + j * N3 +
k])

    return matrix

def convert_point_to_matrix_element(pointx, pointy, pointz, incrementx,
incrementy, incremmentz, startx, starty, startz):
    """ Converts (pointx, pointy, pointz) into the corresponding matrix
element in the 3D-matrix """
    i = (pointx - startx)/incrementx
    j = (pointy - starty) / incrementy
    k = (pointz - startz) / incremmentz

    return int(i), int(j), int(k)

def determine_minimum_in_direction(matrix, x, y, z, dir):
    """ Scans the 3D-matrix from (x, y, z) along dir to find the minimum
value """
    minimum = matrix[x][y][z]
    if dir == "z":
        for i in range(30):
            if minimum > matrix[x][y][z+i]:
                minimum = matrix[x][y][z+i]
                a, b, c = x, y, z+i
    elif dir == "y":
        for i in range(20):
            if minimum > matrix[x][y+i][z]:
                minimum = matrix[x][y+i][z]
                a, b, c = x, y+i, z

    return a, b, c, minimum

def determine_distance(i, j, k, a, b, c, incrementx, incrementy,
incremmentz):
    """ Determines the distance between the atom center and the point at
which the minimum
in the electrostatic potential is found """
    distance = math.sqrt(((i-a) * incrementx)**2 + ((j-b) * incrementy)**2
+ ((k-c) * incremmentz)**2)
    return distance

#
matrix = read_cube_file("pyridine_potential.cube", 89, 87, 66)

#ortho
i, j, k = convert_point_to_matrix_element(-
2.152577,1.359378,0.000186,0.200015,0.200015,0.200015,-8.767684,-9.118581,-
6.513126)
a, b, c, minimum = determine_minimum_in_direction(matrix, i, j, k, "z")
distance = determine_distance(i, j, k, a, b, c, 0.200015,0.200015,0.200015)
print("Minimum electrostatic potential for the ortho-position: ", minimum,
" au, reached at a distance of ", distance)

#meta
i, j, k = convert_point_to_matrix_element(-2.254932, -1.265736,
0.000396,0.200015,0.200015,0.200015,-8.767684,-9.118581,-6.513126)

```

```

a, b, c, minimum = determine_minimum_in_direction(matrix, i, j, k, "z")
distance = determine_distance(i, j, k, a, b, c, 0.200015, 0.200015, 0.200015)
print("Minimum electrostatic potential for the meta-position: ", minimum, "
au, reached at a distance of ", distance)

#para
i, j, k = convert_point_to_matrix_element(0.000054, -
2.605829, 0.000171, 0.200015, 0.200015, 0.200015, -8.767684, -9.118581, -6.513126)
a, b, c, minimum = determine_minimum_in_direction(matrix, i, j, k, "z")
distance = determine_distance(i, j, k, a, b, c, 0.200015, 0.200015, 0.200015)
print("Minimum electrostatic potential for the para-position: ", minimum, "
au, reached at a distance of ", distance)

#N-site
i, j, k = convert_point_to_matrix_element(-0.000055, 2.669695, -
0.000173, 0.200015, 0.200015, 0.200015, -8.767684, -9.118581, -6.513126)
a, b, c, minimum = determine_minimum_in_direction(matrix, i, j, k, "y")
distance = determine_distance(i, j, k, a, b, c, 0.200015, 0.200015, 0.200015)
print("Minimum electrostatic potential for the N-position: ", minimum, "
au, reached at a distance of ", distance)

```

## S9. Geometries and Energies

Units:

- Coordinates are expressed in Å
- Energies are expressed in a.u.

### H<sub>2</sub>

|   |           |           |          |
|---|-----------|-----------|----------|
| H | -0.481363 | -3.249661 | 0.000000 |
| H | -1.225286 | -3.249661 | 0.000000 |

(U)B3LYP/def2-TZVP energy = -1.1796489903919316

### NaCl

|    |           |          |          |
|----|-----------|----------|----------|
| Na | -2.129712 | 1.037992 | 0.000000 |
| Cl | -4.493666 | 1.037992 | 0.000000 |

(U)B3LYP/def2-TZVP energy = -622.6050541289729

### NH<sub>3</sub>

|   |           |          |           |
|---|-----------|----------|-----------|
| N | -0.871712 | 2.101449 | 0.000000  |
| H | -0.500437 | 1.158565 | -0.000300 |
| H | -0.500420 | 2.572625 | 0.816708  |
| H | -0.500420 | 2.573144 | -0.816408 |

(U)B3LYP/def2-TZVP energy = -56.585678339117926

### [NH<sub>4</sub>]<sup>+</sup>

|   |           |          |           |
|---|-----------|----------|-----------|
| N | -0.924598 | 2.092591 | 0.040711  |
| H | -0.570376 | 1.130921 | 0.018242  |
| H | -0.536419 | 2.580887 | 0.854135  |
| H | -0.644267 | 2.580092 | -0.816353 |
| H | -1.947467 | 2.078469 | 0.106738  |

(U)B3LYP/def2-TZVP energy = -56.92385303636355

### H<sub>2</sub>O

|   |           |          |          |
|---|-----------|----------|----------|
| O | -0.670391 | 2.177221 | 0.000000 |
| H | 0.291742  | 2.212724 | 0.000000 |
| H | -0.958092 | 3.096019 | 0.000000 |

(U)B3LYP/def2-TZVP energy = -76.4629947772201

**[H<sub>3</sub>O]<sup>+</sup>**

|   |           |          |           |
|---|-----------|----------|-----------|
| O | -0.715808 | 2.159692 | 0.075634  |
| H | 0.252145  | 2.085289 | -0.066701 |
| H | -1.059719 | 3.070170 | -0.048750 |
| H | -1.234117 | 1.477966 | -0.403304 |

(U)B3LYP/def2-TZVP energy = -76.7375601749838

**H<sub>2</sub>S**

|   |           |          |          |
|---|-----------|----------|----------|
| S | -0.725065 | 2.099859 | 0.000000 |
| H | 0.602802  | 2.298244 | 0.000000 |
| H | -0.981309 | 3.417784 | 0.000000 |

(U)B3LYP/def2-TZVP energy = -399.425346346739

**[H<sub>3</sub>S]**

|   |           |          |           |
|---|-----------|----------|-----------|
| H | -1.280270 | 1.422995 | -0.555014 |
| S | -0.698741 | 2.173308 | 0.415581  |
| H | 0.525855  | 2.168726 | -0.170555 |
| H | -1.071175 | 3.358010 | -0.133135 |

(U)B3LYP/def2-TZVP energy = -399.7048610444624

**H<sub>2</sub>NOH**

|   |           |           |           |
|---|-----------|-----------|-----------|
| N | -1.425905 | 0.298973  | 0.018383  |
| H | -1.005564 | -0.626852 | -0.003445 |
| H | -1.005663 | 0.780854  | 0.809270  |
| O | -0.867789 | 0.964426  | -1.134239 |
| H | -1.653340 | 1.243215  | -1.617321 |

(U)B3LYP/def2-TZVP energy = -131.7778760266885

**[H<sub>2</sub>NOH<sub>2</sub>]<sup>+</sup>**

|   |           |           |           |
|---|-----------|-----------|-----------|
| N | -1.404324 | 0.350623  | 0.121598  |
| H | -1.268622 | -0.646370 | -0.053016 |
| H | -0.821605 | 0.652010  | 0.904759  |
| O | -0.794855 | 0.959242  | -1.082970 |
| H | 0.160783  | 1.179337  | -1.047443 |
| H | -1.347441 | 1.719700  | -1.357735 |

(U)B3LYP/def2-TZVP energy = -132.058357824404

**[H<sub>3</sub>NOH]<sup>+</sup>**

|   |           |           |           |
|---|-----------|-----------|-----------|
| O | -0.958294 | 1.263720  | -1.031207 |
| H | -1.361592 | 0.985847  | -1.874734 |
| N | -1.410813 | 0.383461  | -0.037046 |
| H | -1.110965 | -0.585680 | -0.212278 |
| H | -0.964973 | 0.712276  | 0.828224  |
| H | -2.432259 | 0.427503  | 0.083554  |

(U)B3LYP/def2-TZVP energy = -132.10069622405916

### **H<sub>2</sub>NSH**

|   |           |           |           |
|---|-----------|-----------|-----------|
| N | -1.341546 | 0.336401  | -0.046362 |
| H | -1.059740 | -0.634287 | -0.021917 |
| H | -1.059694 | 0.800500  | 0.806526  |
| S | -0.684085 | 1.130825  | -1.422479 |
| H | -1.851968 | 1.467387  | -2.005207 |

(U)B3LYP/def2-TZVP energy = -454.7852277958409

### **[H<sub>3</sub>NSH]<sup>+</sup>**

|   |           |           |           |
|---|-----------|-----------|-----------|
| H | -1.379070 | 0.966023  | -2.128576 |
| N | -1.390287 | 0.326412  | 0.102637  |
| H | -1.244690 | -0.661754 | -0.123912 |
| H | -0.943065 | 0.509403  | 1.006702  |
| H | -2.392324 | 0.511216  | 0.206383  |
| S | -0.617351 | 1.425820  | -1.116049 |

(U)B3LYP/def2-TZVP energy = -455.11232949317673

### **[H<sub>2</sub>NSH<sub>2</sub>]<sup>+</sup>**

|   |           |           |           |
|---|-----------|-----------|-----------|
| N | -1.221359 | 0.256065  | 0.119855  |
| H | -1.423849 | -0.734457 | 0.114531  |
| H | -0.939228 | 0.672977  | 0.996751  |
| S | -0.809981 | 0.892049  | -1.309651 |
| H | 0.480498  | 1.314139  | -1.194546 |
| H | -1.328975 | 2.143696  | -1.241748 |

(U)B3LYP/def2-TZVP energy = -455.0888253933681

### **C<sub>5</sub>H<sub>5</sub>N**

|   |           |           |           |
|---|-----------|-----------|-----------|
| C | -3.974867 | -1.498504 | 0.000012  |
| C | -2.584665 | -1.502016 | -0.000065 |
| C | -1.919469 | -0.283680 | -0.000276 |
| C | -2.671675 | 0.882943  | -0.000395 |
| C | -4.057925 | 0.778139  | -0.000284 |
| N | -4.709300 | -0.385463 | -0.000094 |
| H | -0.837377 | -0.244211 | -0.000353 |

|   |           |           |           |
|---|-----------|-----------|-----------|
| H | -4.525251 | -2.433730 | 0.000180  |
| H | -2.041940 | -2.438254 | 0.000038  |
| H | -2.198629 | 1.856247  | -0.000567 |
| H | -4.674998 | 1.670770  | -0.000387 |

(U)B3LYP/def2-TZVP energy = -248.3789997769894

**[C<sub>5</sub>H<sub>5</sub>N-H]<sup>+</sup>**

|   |           |           |           |
|---|-----------|-----------|-----------|
| C | -1.184942 | -0.676531 | 0.128909  |
| C | -1.206177 | 0.695067  | 0.006561  |
| C | 0.000255  | 1.387464  | -0.055018 |
| C | 1.206422  | 0.694635  | 0.006894  |
| C | 1.184663  | -0.676954 | 0.129236  |
| H | 0.000461  | 2.465345  | -0.151202 |
| H | -2.071880 | -1.290851 | 0.183730  |
| H | -2.154870 | 1.209997  | -0.039544 |
| H | 2.155312  | 1.209227  | -0.038948 |
| H | 2.071367  | -1.291591 | 0.184303  |
| N | -0.000261 | -1.314634 | 0.185987  |
| H | -0.000454 | -2.324938 | 0.275543  |

(U)B3LYP/def2-TZVP energy = -248.74802257398377

**[C<sub>5</sub>H<sub>6</sub>N]<sup>+</sup><sub>ortho</sub>**

|   |             |             |             |
|---|-------------|-------------|-------------|
| C | -0.58305500 | 1.24064000  | -0.00010700 |
| C | 0.79506200  | 1.19857800  | 0.00000100  |
| C | 1.38927500  | -0.05577100 | 0.00007900  |
| C | 0.60233600  | -1.25564100 | -0.00005900 |
| N | -0.68989500 | -1.24698800 | -0.00006000 |
| H | 1.39188000  | 2.10079000  | -0.00000600 |
| H | -1.12036100 | 2.18312500  | -0.00023400 |
| H | 2.47029900  | -0.14505600 | 0.00012100  |
| H | 1.10231400  | -2.21892900 | -0.00013700 |
| C | -1.34781900 | 0.00385900  | 0.00003900  |
| H | -2.07530000 | 0.00945100  | -0.83814000 |
| H | -2.07436900 | 0.00953600  | 0.83909500  |

(U)B3LYP/def2-TZVP energy = -248.6537621

**[C<sub>5</sub>H<sub>6</sub>N]<sup>+</sup><sub>para</sub>**

|   |           |           |           |
|---|-----------|-----------|-----------|
| C | -1.171007 | -0.743170 | -0.000215 |
| C | -1.237101 | 0.632895  | -0.000136 |
| C | 1.237334  | 0.632449  | 0.000206  |
| C | 1.170743  | -0.743593 | 0.000110  |
| N | -0.000250 | -1.397709 | -0.000094 |
| H | -2.063743 | -1.356323 | -0.000376 |
| H | -2.188234 | 1.151348  | -0.000234 |

|   |          |           |           |
|---|----------|-----------|-----------|
| H | 2.188654 | 1.150559  | 0.000371  |
| H | 2.063258 | -1.357067 | 0.000193  |
| C | 0.000254 | 1.398478  | 0.000086  |
| H | 0.000269 | 2.123196  | 0.841081  |
| H | 0.000501 | 2.123321  | -0.840800 |

(U)B3LYP/def2-TZVP energy = -248.6441624748297

**[C<sub>5</sub>H<sub>6</sub>N]<sup>+</sup><sub>meta</sub>**

|   |           |           |           |
|---|-----------|-----------|-----------|
| C | -1.144165 | -0.716737 | -0.000212 |
| C | -1.225547 | 0.688811  | -0.000131 |
| C | -0.062006 | 1.398597  | 0.000084  |
| C | 1.120390  | -0.781278 | 0.000102  |
| N | -0.002933 | -1.441143 | -0.000101 |
| H | -0.057892 | 2.482277  | 0.000160  |
| H | -2.057259 | -1.304723 | -0.000370 |
| H | -2.193683 | 1.170537  | -0.000236 |
| H | 2.038154  | -1.364318 | 0.000186  |
| C | 1.216755  | 0.684547  | 0.000216  |
| H | 1.846864  | 1.009037  | -0.849300 |
| H | 1.846629  | 1.008926  | 0.849948  |

(U)B3LYP/def2-TZVP energy = -248.6639278746687
